# Supplementary material for: Blood Pressure Trajectories From Childhood to Youth and Arterial Stiffness in Adulthood: A 30-Year Longitudinal Follow-Up Study
Source: Frontiers journal article supplement (doi:10.3389/fcvm.2022.894426), 2022-06-29
Supplement: Data_Sheet_1.PDF [file Data_Sheet_1.PDF]

## Supplementary Material

### 1 Supplementary Figures

#### 1.1 Figure S1

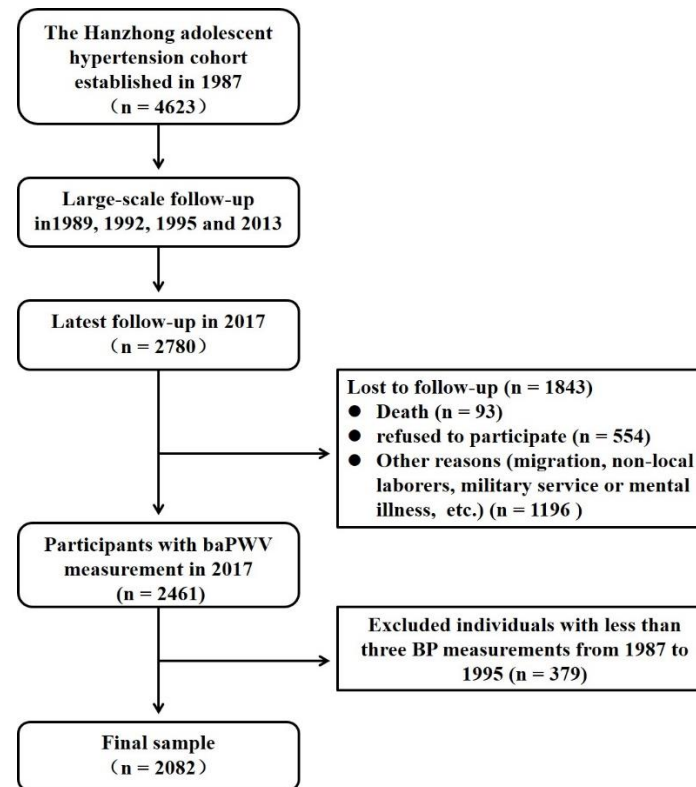

**Figure S1** Flow diagram showing the selection of the study population.

## 1.2 Figure S2

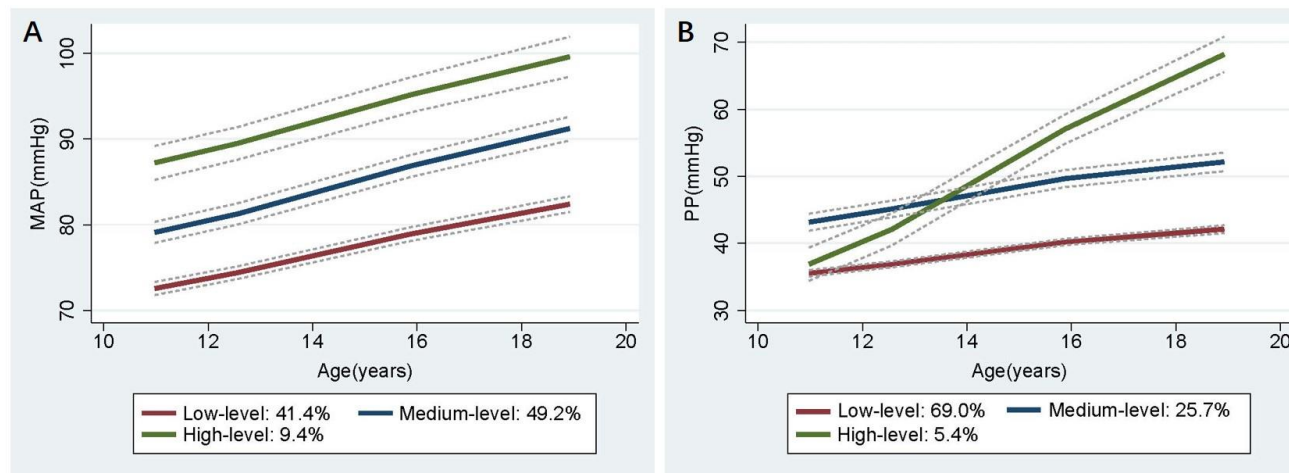

**Figure S2** The trajectories of Mean arterial pressure (A) and Pulse pressure (B) from childhood to youth in the Hanzhong adolescent hypertension cohort

### 1.3 Figure S3

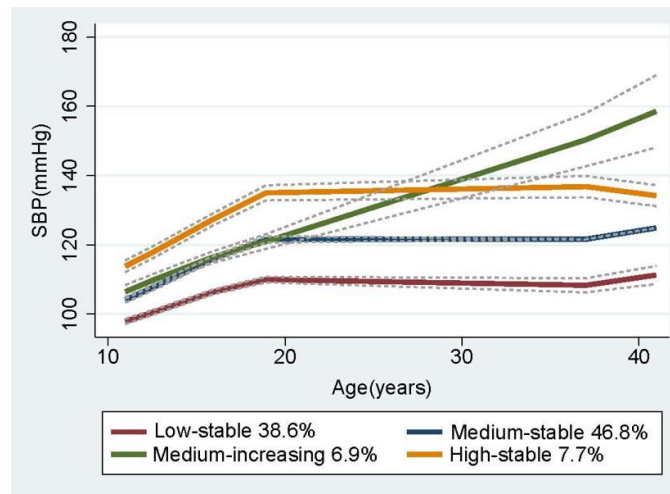

**Figure S3** The trajectories of SBP from childhood to adulthood  
in the Hanzhong adolescent hypertension cohort

## 1.4 Figure S4

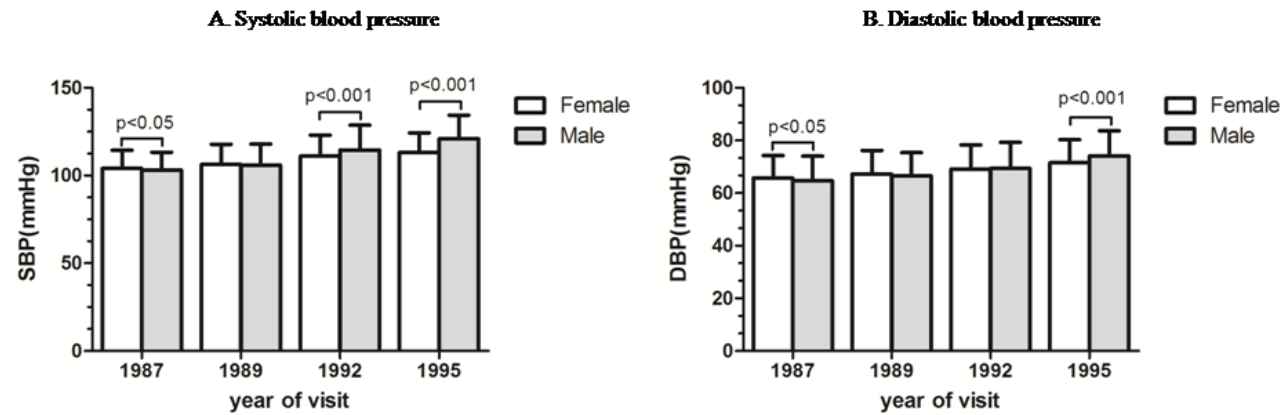

**Figure S4** Comparison of SBP (A) and DBP (B) between sex during each visit between 1987 and 1995

## 1.5 Figure S5

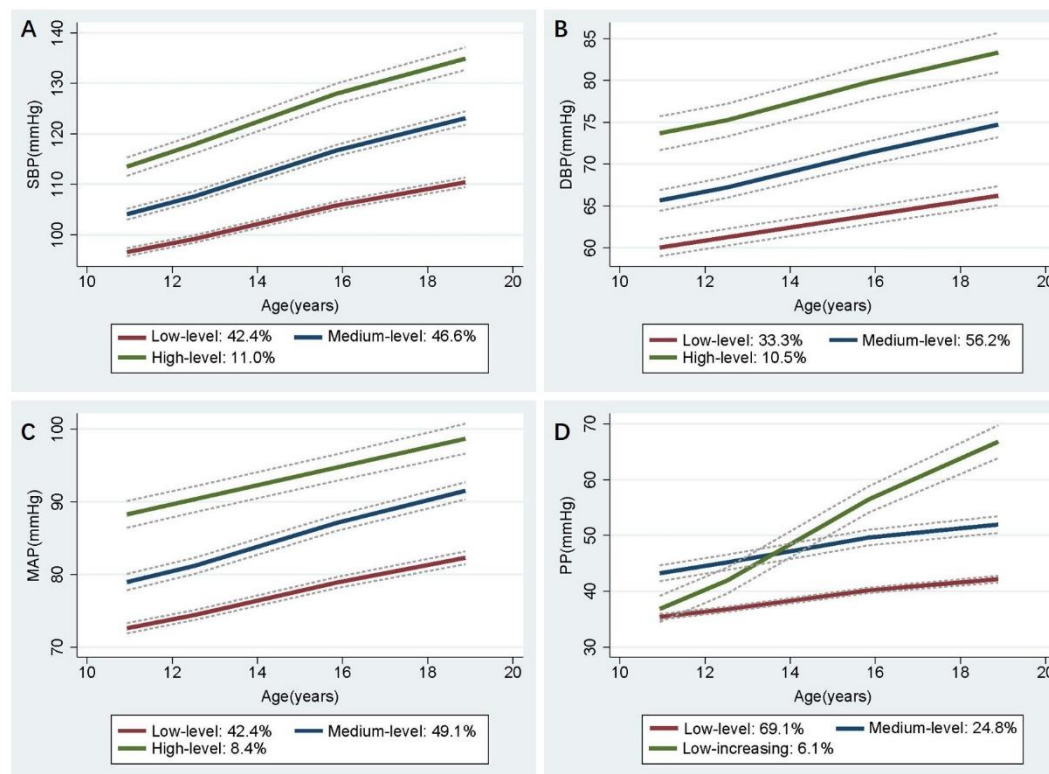

**Figure S5** Trajectories of Systolic blood pressure (A), Diastolic blood pressure (B), Mean arterial pressure (C) and pulse pressure (D) in the population when individuals currently taking antihypertensive, hypoglycemic or statins medicine were excluded (N=86)

## 2 Supplementary Tables

### 2.1 Table S1 Summary of group-based trajectory models (GBTM) fits

| class No. | Polynomial degree | SBP trajectory-related parameters |                            |                             | DBP trajectory-related parameters |                            |                             |
|-----------|-------------------|-----------------------------------|----------------------------|-----------------------------|-----------------------------------|----------------------------|-----------------------------|
|           |                   | -BIC                              | Participants per class (%) | Posterior probabilities (%) | -BIC                              | Participants per class (%) | Posterior probabilities (%) |
| 1         | Linear            | 29709.49                          | 100.0                      | NA                          | 27840.55                          | 100                        | NA                          |
|           | Quadratic         | 29710.73                          | 100.0                      | NA                          | 27844.03                          | 100                        | NA                          |
|           | Cubic             | 29627.45                          | 100.0                      | NA                          | 27834.44                          | 100                        | NA                          |
| 2         | Linear            | 29242.52                          | 61.3/38.7                  | 90.32/85.51                 | 27565.28                          | 59.3/40.7                  | 86.53/82.61                 |
|           | Quadratic         | 29248.57                          | 61.3/38.7                  | 90.19/85.67                 | 27570.68                          | 59.3/40.7                  | 86.56/82.64                 |
|           | Cubic             | 29128.06                          | 60.7/39.3                  | 90.37/86.66                 | 27555.18                          | 59.3/40.7                  | 86.82/82.63                 |
| 3         | Linear            | 29183.63                          | 44.8/46.6/8.6              | 84.78/79.10/79.93           | 27537.28                          | 37.37/54.22/8.4            | 78.59/77.58/77.32           |
|           | Quadratic         | 29194.01                          | 44.9/46.6/8.5              | 84.74/79.22/79.51           | 27546.23                          | 37.7/54.1/8.2              | 78.72/77.85/76.85           |
|           | <b>Cubic</b>      | <b>29066.53</b>                   | <b>43.2/46.8/10.0</b>      | <b>85.23/79.29/80.20</b>    | <b>27526.83</b>                   | <b>35.2/54.9/9.8</b>       | <b>78.25/77.17/77.18</b>    |
| 4         | Linear            | 29181.61                          | 22.1/44.1/30.3/3.5         | 71.96/68.08/75.53/74.50     | 27540.62                          | 31.0/50.1/9.3/9.6          | 72.81/71.54/53.15/74.54     |
|           | Quadratic         | 29195.54                          | 43.3/46.1/8.2/2.4          | 84.14/77.33/72.36/65.54     | 27551.34                          | 28.5/49.1/12.2/10.2        | 70.67/70.79/55.73/75.52     |

|   |           |          |                        |                               |          |                         |                               |
|---|-----------|----------|------------------------|-------------------------------|----------|-------------------------|-------------------------------|
|   | Cubic     | 29052.57 | 40.8/33.2/18.4/7.6     | 81.58/67.54/64.71/80.42       | 27537.23 | 28.3/50.2/10.8/10.7     | 72.67/72.09/59.47/73.73       |
| 5 | Linear    | 29183.54 | 29.3/41.7/24.4/2.7/2.0 | 75.67/66.41/71.70/66.68/77.99 | 27546.33 | 28.0/46.7/12.9/10.6/1.9 | 70.13/67.10/52.30/64.18/77.24 |
|   | Quadratic | 29174.27 | 37.7/20.2/31.8/7.8/2.6 | 78.76/61.11/64.17/70.50/64.23 | 27554.89 | 18.2/40.3/21.6/17.5/2.4 | 65.74/61.44/65.53/56.46/74.66 |
|   | Cubic     | 29054.30 | 39.0/19.2/2.6/32.5/6.8 | 81.15/64.90/69.11/65.77/71.51 | 27544.41 | 19.1/43.6/20.4/14.6/2.3 | 67.70/64.48/65.74/57.70/73.12 |

---

The best fitting model is highlighted in bold characters. BIC: Bayesian information criterion, NA: not applicable.

## 2.2 Table S2 Average SBP and DBP (mmHg) at each visit in SBP trajectory groups

| Visit points     | SBP (mmHg) |              |            | DBP (mmHg) |              |            |
|------------------|------------|--------------|------------|------------|--------------|------------|
|                  | Low-level  | Medium-level | High-level | Low-level  | Medium-level | High-level |
| baseline         | 97.8±7.9   | 106.8±9.0    | 115.3±9.6  | 61.8±7.9   | 67.0±8.8     | 71.8±8.9   |
| 2-year follow-up | 99.5±9.4   | 109.4±9.7    | 120.8±11.9 | 62.8±7.8   | 69.1±8.3     | 74.6±8.8   |
| 5-year follow-up | 105.1±10.1 | 116.7±11.4   | 130.1±11.6 | 65.7±8.3   | 71.1±9.4     | 76.2±9.8   |
| 8-year follow-up | 107.9±9.2  | 122.1±9.6    | 136.0±10.7 | 68.7±7.6   | 75.2±9.0     | 80.2±9.6   |

Abbreviation: SBP, systolic blood pressure; DBP, diastolic blood pressure.



### 2.3 **Table S3** Average SBP and DBP (mmHg) at each visit in DBP trajectory groups

| Visit points     | SBP (mmHg) |              |            | DBP (mmHg) |              |            |
|------------------|------------|--------------|------------|------------|--------------|------------|
|                  | Low-level  | Medium-level | High-level | Low-level  | Medium-level | High-level |
| baseline         | 98.9±9.2   | 105.2±9.6    | 112.8±9.4  | 58.9±7.4   | 67.2±7.5     | 77.2±7.1   |
| 2-year follow-up | 100.7±10.5 | 107.9±11.1   | 116.3±11.4 | 60.7±7.1   | 68.8±7.5     | 78.7±8.2   |
| 5-year follow-up | 106.9±12.3 | 114.8±12.5   | 124.4±11.1 | 62.3±7.0   | 71.7±8.2     | 81.0±8.9   |
| 8-year follow-up | 110.6±11.6 | 119.4±12.0   | 129.2±12.1 | 66.2±7.3   | 75.2±7.8     | 84.7±7.8   |

Abbreviation: SBP, systolic blood pressure; DBP, diastolic blood pressure.

2.4 **Table S4** Number of subjects distributed in 8-year or 30-year SBP trajectories

| SBP trajectories from childhood<br>to youth (8 years) | SBP trajectories from childhood to adulthood (30 years) |               |                   |             |
|-------------------------------------------------------|---------------------------------------------------------|---------------|-------------------|-------------|
|                                                       | Low-stable                                              | Medium-stable | Medium-increasing | High-stable |
| Low-level                                             | 661                                                     | 191           | 37                | -           |
| Medium-level                                          | 140                                                     | 756           | 82                | 43          |
| High-level                                            | -                                                       | 59            | 12                | 101         |

Abbreviation: SBP, systolic blood pressure.

## 2.5 **Table S5** Associations of baPWV in adulthood with MAP and PP trajectories from childhood to youth

| Trajectories          | baPWV in adulthood (cm/s) |                               |                               |
|-----------------------|---------------------------|-------------------------------|-------------------------------|
|                       | All subjects              | Male                          | Female                        |
| SBP trajectory groups |                           |                               |                               |
| Low-level             | 1190.1±220.3              | 1268.6±220.4                  | 1122.9±183.9                  |
| Medium-level          | 1271.4±224.7*             | 1321.6±217.5*                 | 1197.0±233.4*                 |
| High-level            | 1366.1±249.8**            | 1397.9±223.2* <sup>\$</sup>   | 1272.7±231.8* <sup>\$</sup>   |
| DBP trajectory groups |                           |                               |                               |
| Low-level             | 1206.7±212.9              | 1268.1±201.1                  | 1120.5±183.3                  |
| Medium-level          | 1253.9±231.9*             | 1324.3±227.5*                 | 1175.0±221.3 <sup>&amp;</sup> |
| High-level            | 1344.5±268.9**            | 1485.8±269.9**                | 1241.4±237.3**                |
| MAP trajectory groups |                           |                               |                               |
| Low-level             | 1193.1±203.0              | 1273.2±213.2                  | 1129.9±186.9                  |
| Medium-level          | 1269.4±236.6*             | 1323.1±216.8*                 | 1184.8±224.9*                 |
| High-level            | 1358.4±269.5**            | 1522.5±223.2**                | 1261.2±253.8* <sup>\$</sup>   |
| PP trajectory groups  |                           |                               |                               |
| Low-level             | 1228.0±232.7              | 1293.0±233.3                  | 1165.9±218.1                  |
| Medium-level          | 1283.5±218.2*             | 1320.8±208.1 <sup>&amp;</sup> | 1201.4±221.0                  |
| High-level            | 1319.4±236.3*             | 1354.9±226.6 <sup>&amp;</sup> | 1200.5±218.4                  |

SBP, systolic blood pressure; DBP, diastolic blood pressure; MAP, mean arterial pressure; PP, pulse pressure. \* $P < 0.001$ , and <sup>&</sup> $P < 0.05$  vs.

Low-level group; # $P < 0.001$ , and <sup>\$</sup> $P < 0.05$  vs. Medium-level group;

**2.6 Table S6** Associations of baPWV in adulthood with MAP and PP trajectories from childhood to youth

| Trajectories          | N    | Model1             |         | Model2             |         | Model3             |         |
|-----------------------|------|--------------------|---------|--------------------|---------|--------------------|---------|
|                       |      | β(95%CI)           | p-value | β(95%CI)           | p-value | β(95%CI)           | p-value |
| MAP trajectory groups |      |                    |         |                    |         |                    |         |
| Low-level             | 856  | Reference          |         | Reference          |         | Reference          |         |
| Medium-level          | 1074 | 76.3(66.2-86.5)    | <0.001  | 67.8(58.2-77.4)    | <0.001  | 55.5(44.0-67.0)    | <0.001  |
| High-level            | 152  | 165.3(145.8-184.8) | <0.001  | 158.8(140.4-177.3) | <0.001  | 139.3(117.1-161.4) | <0.001  |
| PP trajectory groups  |      |                    |         |                    |         |                    |         |
| Low-level             | 1515 | Reference          |         | Reference          |         | Reference          |         |
| Medium-level          | 485  | 55.5(43.7-67.2)    | <0.001  | 31.8(20.6-43.1)    | <0.001  | 4.0(-8.1-16.1)     | 0.519   |
| High-level            | 82   | 91.3(65.8-116.8)   | <0.001  | 40.9(16.4-62.3)    | 0.001   | 6.3(-19.4-32.0)    | 0.630   |

Abbreviation: baPWV, brachial–ankle pulse wave velocity; MAP, mean arterial pressure; PP, pulse pressure. CI, confidence interval.

Dependent variables: baPWV. Model1: Unadjusted; Model2: Adjusted for age, sex (male=1, female=0); Model3: adjustments as in model2 plus time-dependent variables (body mass index, SBP, DBP, MAP and heart rate), childhood factors including father's education level and mother's education level (College or university=0, High school=1, Middle school=2 and Primary or less=3) and adulthood factors including family history of hypertension(Yes=1, No=0) , smokers(Yes=1, No=0), TC, TG, LDL-C, HDL-C, uric acid, and fasting blood glucose.

2.7 **Table S7** Association of age terms and height between average age of 11 and 19 years with child-to-youth SBP trajectories

| Group                   | Parameter | Estimate  | SE       | T value | P value |
|-------------------------|-----------|-----------|----------|---------|---------|
| Low-level trajectory    | Intercept | 114.77911 | 7.08207  | 16.207  | 0.0000  |
|                         | age       | -12.46207 | 1.51996  | -8.199  | 0.0000  |
|                         | age2      | 0.87104   | 0.10819  | 8.051   | 0.0000  |
|                         | age3      | -0.01793  | 0.00247  | -7.272  | 0.0000  |
|                         | height    | 0.33068   | 0.02539  | 13.024  | 0.0000  |
| Medium-level trajectory | Intercept | 107.22189 | 5.65892  | 18.947  | 0.0000  |
|                         | age       | -12.55749 | 1.25724  | -9.988  | 0.0000  |
|                         | age2      | 0.82565   | 0.08990  | 9.184   | 0.0000  |
|                         | age3      | -0.01666  | 0.00206  | -8.095  | 0.0000  |
|                         | height    | 0.36394   | 0.02635  | 13.810  | 0.0000  |
| High-level trajectory   | Intercept | 97.67417  | 15.03576 | 6.496   | 0.0000  |
|                         | age       | -12.48068 | 3.48212  | -3.584  | 0.0003  |
|                         | age2      | 0.81159   | 0.24857  | 3.265   | 0.0011  |
|                         | age3      | -0.01558  | 0.00575  | -2.711  | 0.0067  |
|                         | height    | 0.54634   | 0.06453  | 8.467   | 0.0000  |

The level (intercept) and change (age-linear, age<sup>2</sup>-quadratic and age<sup>3</sup>-cubic terms) of BP, standard errors and level of significance of the three height-adjusted BP trajectories.

2.8 **Table S8** Associations of baPWV in adulthood with BP trajectories from childhood to youth by sex

| Trajectories          | Male                |         |                    |         | Female             |         |                   |         |
|-----------------------|---------------------|---------|--------------------|---------|--------------------|---------|-------------------|---------|
|                       | Unadjusted model    |         | adjusted model     |         | Unadjusted model   |         | adjusted model    |         |
|                       | $\beta$ (95%CI)     | P value | $\beta$ (95%CI)    | P value | $\beta$ (95%CI)    | P value | $\beta$ (95%CI)   | P value |
| SBP trajectory groups |                     |         |                    |         |                    |         |                   |         |
| Low-level             | Reference           |         | Reference          |         | Reference          |         | Reference         |         |
| Medium-level          | 53.0(39.2-66.8)     | <0.001  | 45.9(29.8-62.0)    | <0.001  | 74.1(60.0-8.2)     | < 0.001 | 62.7(45.8-79.6)   | < 0.001 |
| High-level            | 128.6(103.9- 153.4) | <0.001  | 116.2(86.3-146.1)  | <0.001  | 149.8(126.3-173.5) | < 0.001 | 114.6(84.9-144.4) | < 0.001 |
| DBP trajectory groups |                     |         |                    |         |                    |         |                   |         |
| Low-level             | Reference           |         | Reference          |         | Reference          |         | Reference         |         |
| Medium-level          | 56.2(42.8-69.6)     | < 0.001 | 55.8(40.2-71.4)    | < 0.001 | 54.5(37.9-71.0)    | < 0.001 | 31.5(12.7-50.2)   | 0.001   |
| High-level            | 217.6(181.3- 253.9) | < 0.001 | 220.8(181.3-260.3) | < 0.001 | 120.9(99.0-142.7)  | < 0.001 | 91.3(63.4-119.2)  | < 0.001 |
| MAP trajectory groups |                     |         |                    |         |                    |         |                   |         |
| Low-level             | Reference           |         | Reference          |         | Reference          |         | Reference         |         |
| Medium-level          | 49.9(36.7-63.0)     | < 0.001 | 48.7(33.0-64.4)    | < 0.001 | 54.9(40.4-69.4)    | < 0.001 | 35.5(18.4-52.7)   | < 0.001 |
| High-level            | 249.3(213.3-285.3)  | < 0.001 | 231.3(191.7-270.8) | < 0.001 | 131.3(108.8-153.8) | < 0.001 | 100.7(72.1-129.3) | < 0.001 |
| PP trajectory groups  |                     |         |                    |         |                    |         |                   |         |
| Low-level             | Reference           |         | Reference          |         | Reference          |         | Reference         |         |
| Medium-level          | 27.8(14.2-41.4)     | < 0.001 | 6.0(-8.6-20.6)     | 0.419   | 35.5(17.8-53.2)    | < 0.001 | 11.1(-8.7-30.8)   | 0.273   |
| High-level            | 62.0(21.2-91.7)     | < 0.001 | 9.0(-23.6-41.6)    | 0.589   | 34.7(-8.8-78.1)    | 0.118   | -24.6(-69.3-20.2) | 0.283   |

Abbreviation: baPWV, brachial–ankle pulse wave velocity; SBP, systolic blood pressure; DBP, diastolic blood pressure. CI, confidence interval.

Dependent variables: baPWV. Adjusted Model: adjustments as in model2 plus time-dependent variables (body mass index, SBP, DBP, MAP and heart rate), childhood factors including father's education level and mother's education level (College or university=0, High school=1, Middle school=2 and Primary or less=3) and adulthood factors including family history of hypertension(Yes=1, No=0) , smokers(Yes=1, No=0), TC, TG, LDL-C, HDL-C, uric acid, and fasting blood glucose.
